# Supplementary material for: Genome-wide analysis of epigenetic dynamics across human developmental stages and tissues
Source: PubMed Central journal article supplement (PMC6457072; doi:10.1186/s12864-019-5472-0), 2019-04-04
Supplement: 12864_2019_5472_MOESM1_ESM.pdf [file 12864_2019_5472_MOESM1_ESM.pdf]

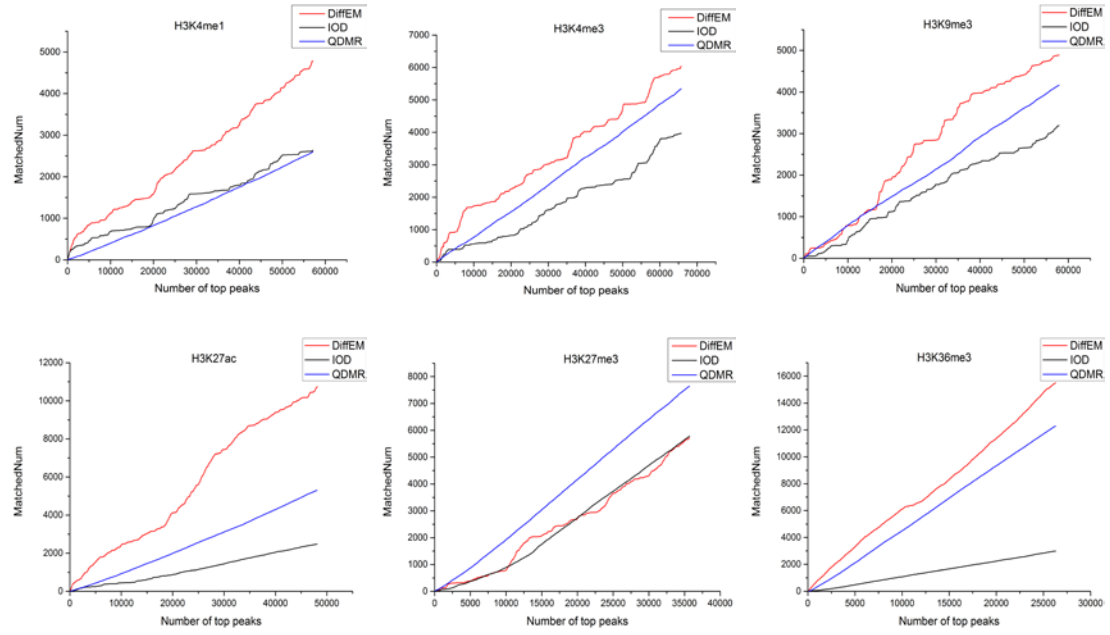

A

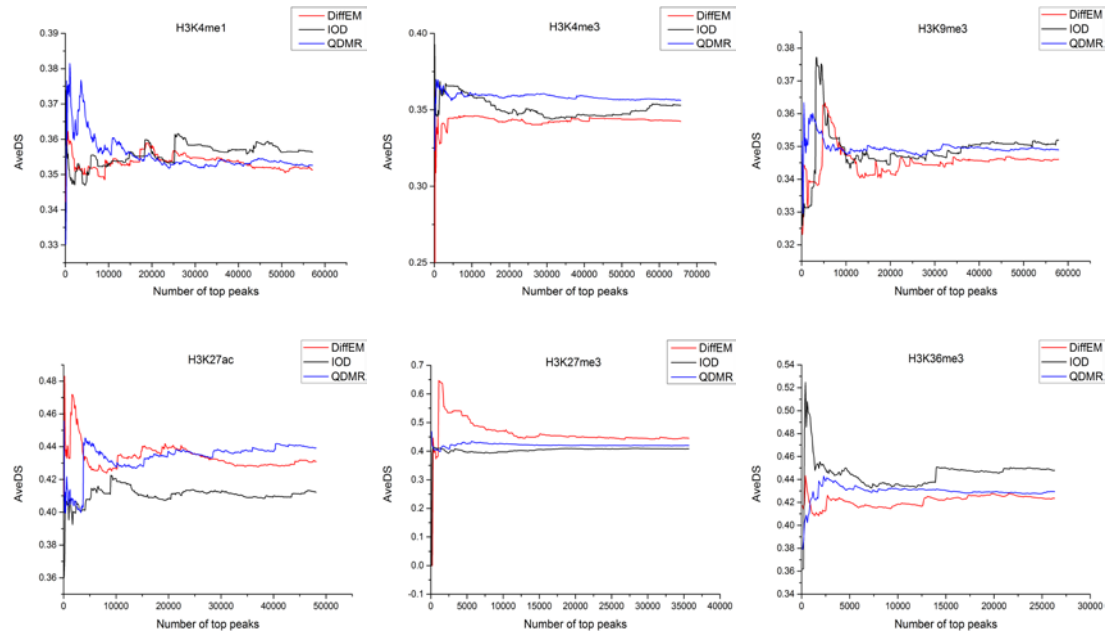

B

**Figure S1:** Performance comparisons for primary tissues among our method DiffEM, IOD and QDMR for each epigenetic mark. (A) The MatchedNum, (B) The AveDS.

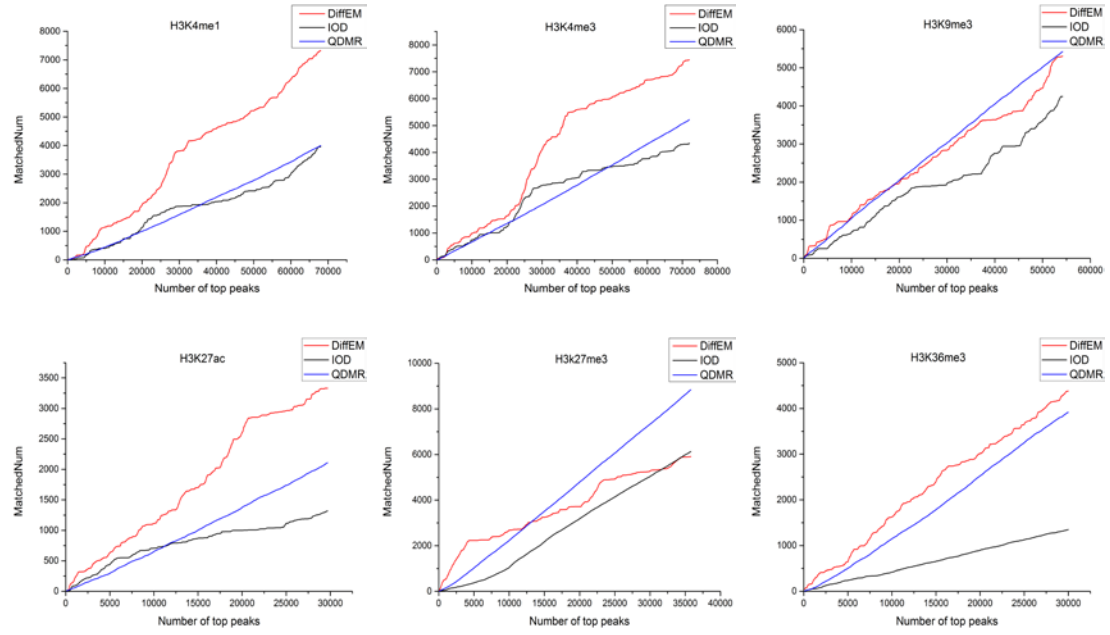

A

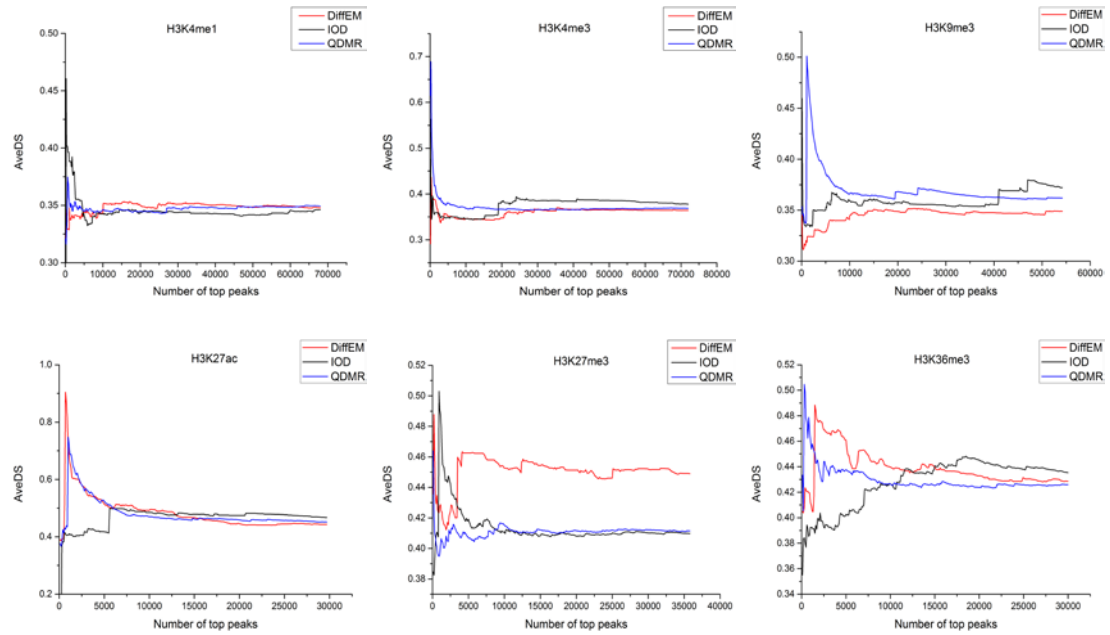

B

**Figure S2:** Performance comparisons for the whole group among our method DiffEM, IOD and QDMR for each epigenetic mark. (A) The MatchedNum, (B) The AveDS.
